# Supplementary material
Source: MDPI journal article supplement (https://www.mdpi.com/2379-139X/7/3/40)
Supplement: s1 [file s1]

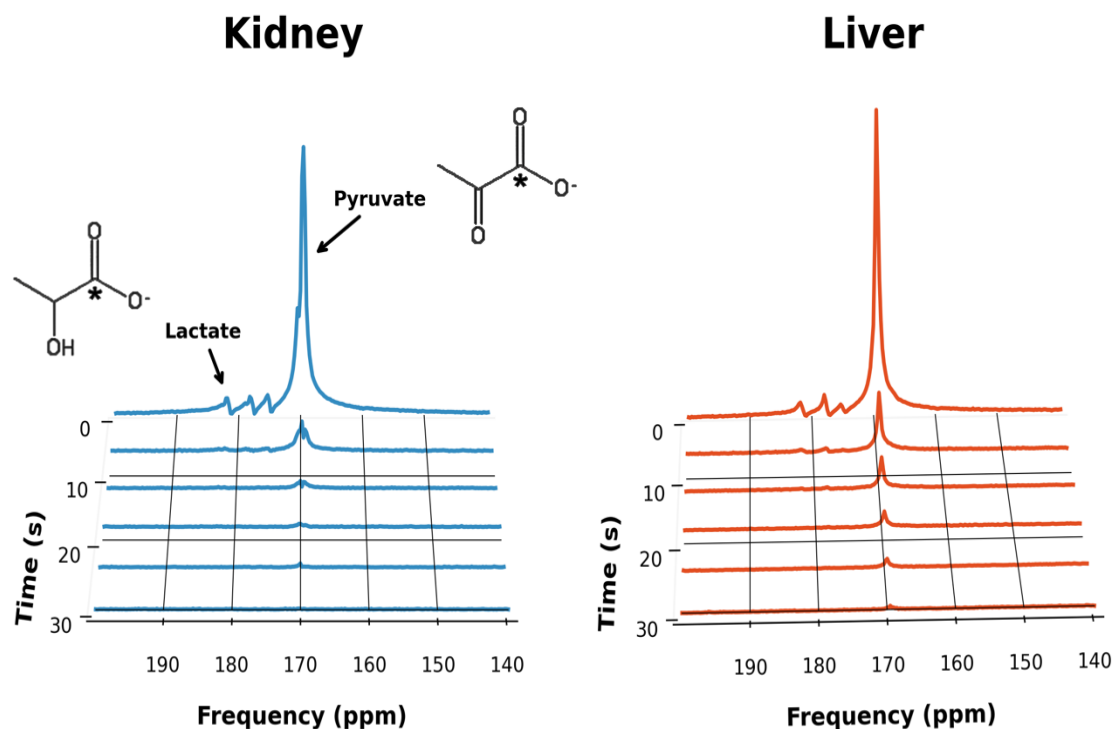

**Figure S1:** Dynamic  $^{13}\text{C}$  spectra from the liver and kidney. All spectra are shown with the scale. Locations of each ROI are shown in **Figure 5**.  $^{13}\text{C}$ -labeled positions are indicated by stars. All spectra were acquired using CSI as described in the main text.
